# Supplementary material
Source: Springer Nature journal article supplement (https://www.springermedizin.de/resource/supplementary/12936_2013_2671_MOESM12_ESM.pdf/9545084)

Post-prandial killing effect

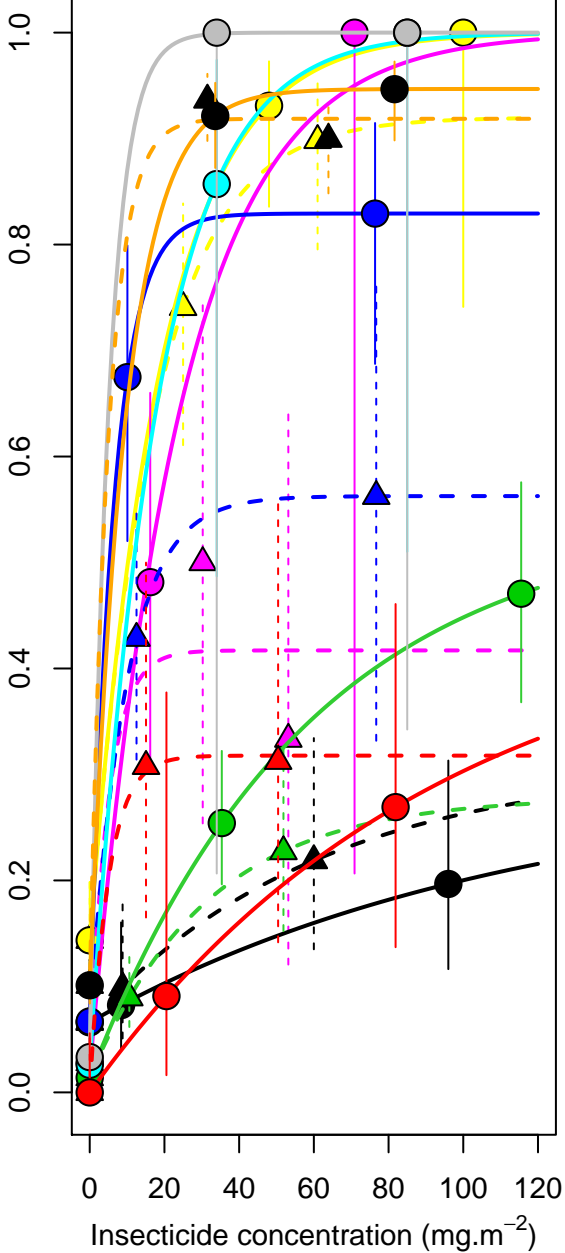

Supplement: MOESM12 [file 9545084]
